# Supplementary material for: Burden of cardiovascular diseases associated with fine particulate matter in Beijing, China: an economic modelling study
Source: PubMed Central journal article supplement — BMJ Glob Health. 2020 Oct 20;5(10):e003160. doi: 10.1136/bmjgh-2020-003160 (PMC7577033; doi:10.1136/bmjgh-2020-003160), 2020-10-20
Supplement: bmjgh-2020-003160supp001.pdf [file bmjgh-2020-003160supp001.pdf]

Supplementary materials

A Health Economic Approach to Estimate the Burden of Cardiovascular Diseases  
Associated with Fine Particulate Matter: The Case of Beijing and Its Implications

Journal: BMJ Global Health

Authors: Yawen Jiang, Shan Jiang, and Weiyi Ni

Corresponding Author: Yawen Jiang

Sun Yat-sen University School of Public Health (Shenzhen)

Corresponding Email: [jiangyw26@mail.sysu.edu.cn](mailto:jiangyw26@mail.sysu.edu.cn);

### Part 1. Cardiovascular event risk equation

The cardiovascular risk equation was extracted from a previous epidemiology study in China.<sup>1</sup>

10-year integrated probability of AMI and stroke for Chinese male=

$$1 - 0.9835^{\exp(\sum \beta_i X_i)},$$

where  $\sum \beta_i X_i = 0.0656 \times age_i - 0.5488 \times I(SBP_i < 120) + 0.4011 \times I(130 \leq SBP_i \leq 139) + 0.8073 \times I(139 < SBP_i \leq 159) + 1.7041 \times I(159 < SBP_i \leq 179) + 2.5327 \times I(SBP_i > 179) + 0.2864 \times I(BMI_i \geq 24) - 0.007 \times I(3.62 \leq TC_i < 5.17) + 0.304 \times I(TC_i \geq 5.17) + 0.7082 \times SMOKING_i + 0.0651 \times DIABETES_i - 3.5951$ .

10-year integrated probability of AMI and stroke for Chinese female=

$$1 - 0.9948^{\exp(\sum \beta_i X_i)},$$

where  $\sum \beta_i X_i = 0.0851 \times age_i - 0.8267 \times I(SBP_i < 120) + 0.2294 \times I(130 \leq SBP_i \leq 139) + 0.7970 \times I(139 < SBP_i \leq 159) + 1.3674 \times I(159 < SBP_i \leq 179) + 1.8483 \times I(SBP_i > 179) + 0.6762 \times I(BMI_i \geq 24) - 0.0866 \times I(3.62 \leq TC_i < 5.17) + 0.2654 \times I(TC_i \geq 5.17) + 0.4699 \times SMOKING_i + 0.9599 \times DIABETES_i - 3.8780$ .

In the equations above,  $I(\cdot)$  is an indicator function of whether the condition in the parentheses is true, SBP<sub>i</sub> is the systolic blood pressure (mm Hg) of the simulated individual, TC<sub>i</sub> is the total cholesterol (mmol/L), BMI is the body mass index (kg/m<sup>2</sup>), SMOKING<sub>i</sub> is an indicator of smoking, and DIABETES<sub>i</sub> is an indicator of having diabetes.

### Part 2. The DEALE method and transferring 10-year probability to 1-year probability

The DEALE method assumes an exponential distribution of time to event and allows algebraic calculation of 1-year probability from 10-year probability.<sup>2</sup> Specifically, the following formulas were used:

$$r_{1year} = -\left(\frac{1}{10}\right) \cdot \ln[1 - (p_{10year})],$$

$$p_{1year} = 1 - e^{-r_{1year}}$$

where  $r_{1year}$  is the 1-year rate,  $p_{1year}$  is the 1-year probability, and  $p_{10year}$  is the 10-year probability.

### Part 3. Proportions of AMI and stroke

The respective proportions of AMI and stroke out of total AMI and stroke events were calculated using numbers from the cardiovascular risk equation estimation study<sup>1</sup>. The numbers of AMI and stroke events were 66 and 158 among men, and were 39 and 108 among women. Using these numbers for calculation, the proportions of AMI and stroke were 29.46% and 70.54% among men, and were 26.53% and 73.57% among women. The proportions were not age-varying because the source data did not allow age-varying data extraction.

As such, the 1-year probability of AMI was calculated as  $p_{AMI} = p_{AMI\&stroke} \times 29.46\%$  and the 1-year probability of stroke was calculated as  $p_{stroke} = p_{AMI\&stroke} \times 70.54\%$  for men. The probabilities for women were calculated using the same approach.

## Part 4. Angina to stroke ratio

We calculated angina-stroke incidence ratio by age group (Table S1) using age group specific angina and stroke prevalence data.<sup>3</sup>

Table S1. Angina-stroke incidence ratio

|       | Self-reported prevalence (%) |        | Incidence in the corresponding period (%) |        | Incidence ratio |
|-------|------------------------------|--------|-------------------------------------------|--------|-----------------|
|       | stroke                       | angina | stroke                                    | angina | Angina/stroke   |
| <59   | 1.5                          | 4.4    | 1.5                                       | 4.4    | 2.93            |
| 60-69 | 3.4                          | 9.0    | 1.9                                       | 4.6    | 2.42            |
| 70-79 | 5.3                          | 13.1   | 1.9                                       | 4.1    | 2.16            |
| >80   | 7.1                          | 14.5   | 1.8                                       | 1.4    | 0.78            |

## Part 5. Diabetes prevalence to incidence conversion

The diabetes prevalence rate of Chinese children is 0.11%.<sup>4</sup> The exact prevalence rate of 18 years old Chinese people was not available. Diabetes prevalence rates of Chinese adults were obtained from a Chinese epidemiology study.<sup>5</sup> We calculated 10-year incidence rates of diabetes (Table S2) using prevalence rates and transferred 10-year incidence rates to 1-year probabilities using the aforementioned DEALE method. Age group 70-79 incidence rate was extrapolated to age group 80-89.

Table S2. Diabetes prevalence rates and incidence rates of Chinese population

|        | Prevalence rate | 10-year incidence rate | rate                  | 1-year probability |
|--------|-----------------|------------------------|-----------------------|--------------------|
| male   |                 |                        |                       |                    |
| 18-19  | 0.00108         | NA                     | NA                    | NA                 |
| 20-29  | 0.0261          | 0.02502                | 0.002534              | 0.25%              |
| 30-39  | 0.0521          | 0.026                  | 0.002634              | 0.26%              |
| 40-49  | 0.1111          | 0.059                  | 0.006081              | 0.61%              |
| 50-59  | 0.1547          | 0.0436                 | 0.004458              | 0.44%              |
| 60-69  | 0.1813          | 0.0266                 | 0.002696              | 0.27%              |
| 70-79  | 0.2185          | 0.0372                 | 0.003791              | 0.38%              |
| 80-89  | NA              | 0.0372 <sup>a</sup>    | 0.003791 <sup>a</sup> | 0.38% <sup>a</sup> |
| female |                 |                        |                       |                    |
| 18-19  | 0.00108         | NA                     | NA                    | NA                 |
| 20-29  | 0.0124          | 0.01132                | 0.001138              | 0.11%              |
| 30-39  | 0.0301          | 0.0177                 | 0.001786              | 0.18%              |
| 40-49  | 0.073           | 0.0429                 | 0.004385              | 0.44%              |
| 50-59  | 0.1309          | 0.0579                 | 0.005964              | 0.59%              |
| 60-69  | 0.2028          | 0.0719                 | 0.007462              | 0.74%              |
| 70-79  | 0.2197          | 0.0169                 | 0.001704              | 0.17%              |
| 80-89  | NA              | 0.0169 <sup>a</sup>    | 0.001704 <sup>a</sup> | 0.17% <sup>a</sup> |

<sup>a</sup>: Extrapolated from the adjacent age group.

## Part 6. Relationship between BMI and age

The relationship between BMI and age is as following.<sup>6</sup>

Male: BMI = BMI at 43.4 years old + 0.002 × 43.4<sup>2</sup> - 0.22 × 43.4 + 0.22 × age - 0.002 × age<sup>2</sup>

Female: BMI = BMI at 44.3 years old + 0.002 × 44.3<sup>2</sup> - 0.22 × 44.3 + 0.22 × age - 0.002 × age<sup>2</sup>

## Part 7. Relationship between SBP and age

The relationship between SBP and age is as following:

Male: SBP = SBP at 43.4 years old + 0.64 × (age - 43.4)

Female: SBP = SBP at 44.3 years old + 0.64 × (age - 44.3).

The following regression equation was used to estimate the linear relationship between SBP and age of Chinese using the 2013 wave of the China Health and Retirement Longitudinal Study (CHARLS):

$$SBP = \alpha + \beta_1 age + \beta_2 I_{male} + \beta_3 I_{married} + \beta_4 BMI + \beta_5 I_{dd} + \beta_6 I_{smoke} + \beta_7 GH$$

where  $I_{male}$  is an indicator for male,  $I_{married}$  is an indicator for currently married,  $I_{dd}$  is an indicator for drink daily or more often, and GH is self-reported general health (1=excellent, 5=poor). More information on CHARLS can be found at <http://charls.pku.edu.cn/en>.

## Part 8. Angina sequelae duration

To be consistent with literature, the duration of angina sequelae varied across age and gender groups (Table S3).<sup>7</sup>

Table S3. Angina sequelae duration (years)

| age   | male | female |
|-------|------|--------|
| 18-19 | 26   | 30     |
| 20-24 | 26   | 30     |
| 25-29 | 26   | 30     |
| 30-34 | 16   | 20     |
| 35-39 | 16   | 20     |
| 40-44 | 16   | 20     |
| 45-49 | 11   | 13     |
| 50-54 | 11   | 13     |
| 55-59 | 11   | 13     |
| 60-64 | 8    | 9      |
| 65-69 | 8    | 9      |
| 70-74 | 5    | 5      |
| 75-79 | 5    | 5      |
| 80-84 | 3    | 3      |
| 85-89 | 3    | 3      |

## Part 9. Beijing population by age and sex group

The Beijing population by age group<sup>8</sup> and the Beijing population age-sex pyramid<sup>9</sup> were used to calculate the population in each age group for each sex (Table S4).

Table S4. Beijing population in 2014 by age-sex group

| age   | % female population in the age group out of total Beijing population | % male population in the age group out of total Beijing population | % female in this age group | % male in this age group | 2014 population in age group | 2014 female population | 2014 male population |
|-------|----------------------------------------------------------------------|--------------------------------------------------------------------|----------------------------|--------------------------|------------------------------|------------------------|----------------------|
| 15-19 | 2.53                                                                 | 2.85                                                               | 46.97                      | 53.03                    | 846,000                      | 397,343                | 448,657              |
| 20-24 | 6.16                                                                 | 6.66                                                               | 48.07                      | 51.93                    | 2,237,000                    | 1,075,329              | 1,161,671            |
| 25-29 | 5.58                                                                 | 5.93                                                               | 48.50                      | 51.50                    | 2,436,000                    | 1,181,486              | 1,254,514            |
| 30-34 | 4.27                                                                 | 4.68                                                               | 47.71                      | 52.29                    | 2,297,000                    | 1,095,895              | 1,201,105            |
| 35-39 | 3.91                                                                 | 4.46                                                               | 46.69                      | 53.31                    | 1,682,000                    | 785,319                | 896,681              |
| 40-44 | 3.76                                                                 | 4.39                                                               | 46.16                      | 53.84                    | 1,836,000                    | 847,454                | 988,546              |
| 45-49 | 3.76                                                                 | 4.24                                                               | 47.00                      | 53.00                    | 1,708,000                    | 802,780                | 905,220              |
| 50-54 | 3.33                                                                 | 3.44                                                               | 49.17                      | 50.83                    | 1,615,000                    | 794,163                | 820,837              |
| 55-59 | 2.96                                                                 | 3.00                                                               | 49.70                      | 50.30                    | 1,513,000                    | 751,887                | 761,113              |
| 60-64 | 1.95                                                                 | 1.90                                                               | 50.56                      | 49.44                    | 1,093,000                    | 552,609                | 540,391              |
| 65-69 | 1.51                                                                 | 1.32                                                               | 53.40                      | 46.60                    | 715,000                      | 381,790                | 333,210              |
| 70-74 | 1.44                                                                 | 1.32                                                               | 52.17                      | 47.83                    | 495,000                      | 258,223                | 236,777              |
| 75-79 | 1.00                                                                 | 1.02                                                               | 49.40                      | 50.60                    | 456,000                      | 225,253                | 230,747              |
| 80-84 | 0.64                                                                 | 0.66                                                               | 49.14                      | 50.86                    | 293,000                      | 143,991                | 149,009              |
| 85-89 | 0.42                                                                 | 0.37                                                               | 53.34                      | 46.66                    | 164,000                      | 87,473                 | 76,527               |

## Part 10. Monetize QALYs using an alternative WTP threshold

Table S5. Population and individual expected lifetime NML using the once the GDP per capita WTP threshold

|                                  | Male          | Female        | Total         |
|----------------------------------|---------------|---------------|---------------|
| Population 1-year NML            | \$427,396,864 | \$431,837,990 | \$859,234,855 |
| Individual expected lifetime NML | \$1,329       | \$1,087       | NA            |

NA, not applicable.

## Part 11. Model assumptions

Table S6. Summary of assumptions

| Assumption category   | Assumption                                                                                                                                                                                                                                                                      |
|-----------------------|---------------------------------------------------------------------------------------------------------------------------------------------------------------------------------------------------------------------------------------------------------------------------------|
| Population            | The population have been exposed long enough to experience the full hazard of PM <sub>2.5</sub> pollution.                                                                                                                                                                      |
| Risk calculation      | Incidence ratios of angina to stroke in all groups in Beijing are the same as those in entire China                                                                                                                                                                             |
| Risk calculation      | Smoking status of an individual doesn't change                                                                                                                                                                                                                                  |
| Risk calculation      | When the data for the age group 80-89 are not available, the data from 70-79 are used (diabetes). Similarly, the data for age group 80-84 (angina sequelae duration) or 75-84 (AMI and stroke 28-day mortality) are used for age group 85-89 when the relevant data are absent. |
| Risk calculation      | The relationships between SBP and age and between BMI and age of overall Chinese population are portable to Beijing population.                                                                                                                                                 |
| Risk calculation      | Diabetes prevalence and incidence data for overall Chinese population are portable to Beijing population.                                                                                                                                                                       |
| Risk calculation      | Risk factors of cardiovascular diseases are not correlated.                                                                                                                                                                                                                     |
| Risk calculation      | Without risk factors, the baseline hazard function of cardiovascular disease of Beijing population is the same as that of overall Chinese population.                                                                                                                           |
| Risk calculation      | The CVD risk equation from the reference represents average individual risk at the current pollution level                                                                                                                                                                      |
| Costs and QALY inputs | Unstable angina requires hospitalization.                                                                                                                                                                                                                                       |
| Effect of pollution   | The long-term effect of PM <sub>2.5</sub> pollution is represented by annual average concentration.                                                                                                                                                                             |

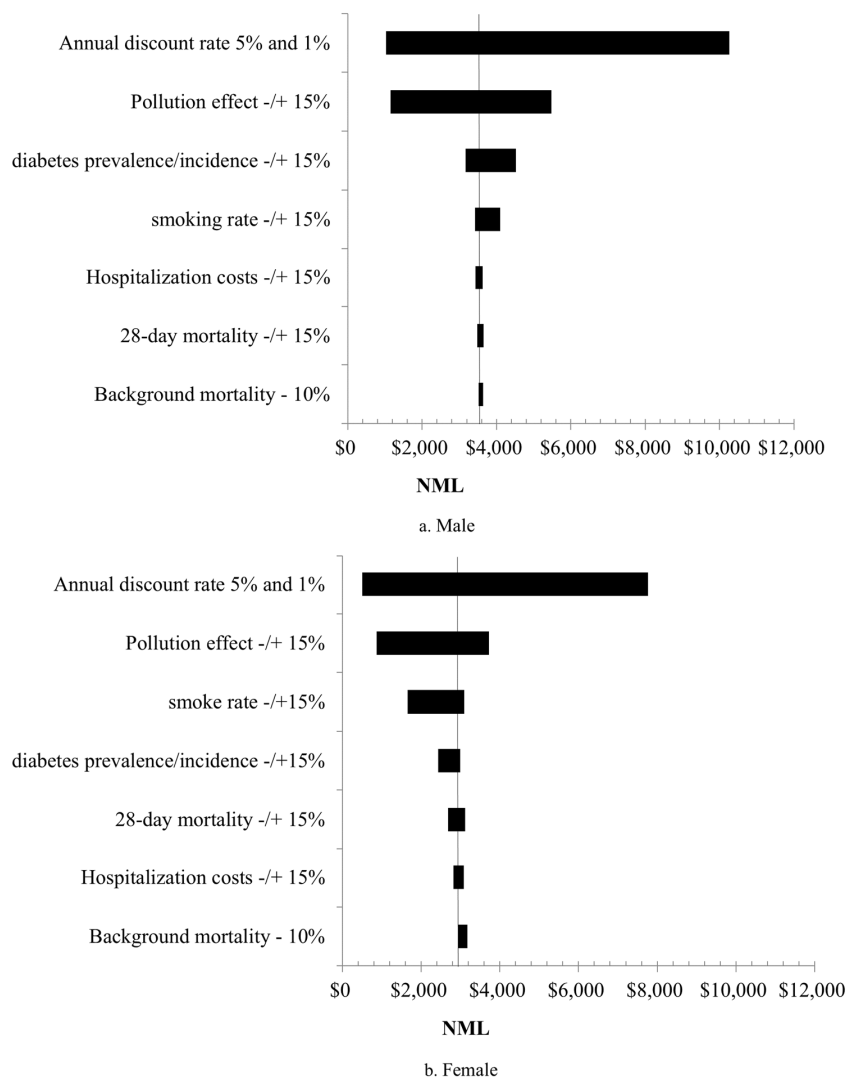

Fig S1. One-way sensitivity analyses for individual male (a) and female (b). The expected individual lifetime net monetary loss (NML) results were sensitive to changes in the annual discount rate and pollution effect.

#### Supplementary Materials References

1. Wu Y, Liu X, Li X, et al. Estimation of 10-year risk of fatal and nonfatal ischemic cardiovascular diseases in Chinese adults. *Circulation* 2006;114(21):2217-25.
2. Beck JR, Pauker SG, Gottlieb JE, et al. A convenient approximation of life expectancy (the "DEALE"): II. Use in medical decision-making. *The American journal of medicine* 1982;73(6):889-97.

3. Wu F, Guo Y, Kowal P, et al. Prevalence of major chronic conditions among older Chinese adults: the Study on Global AGEing and adult health (SAGE) wave 1. *PLoS One* 2013;8(9):e74176.
4. Fu J-F, Liang L, Gong C-X, et al. Status and trends of diabetes in Chinese children: analysis of data from 14 medical centers. *World Journal of Pediatrics* 2013;9(2):127-34.
5. Yang Z-J, Liu J, Ge J-P, et al. Prevalence of cardiovascular disease risk factor in the Chinese population: the 2007–2008 China National Diabetes and Metabolic Disorders Study. *European heart journal* 2011:ehr205.
6. Jaacks LM, Gordon-Larsen P, Mayer-Davis EJ, et al. Age, period and cohort effects on adult body mass index and overweight from 1991 to 2009 in China: the China Health and Nutrition Survey. *International journal of epidemiology* 2013;42(3):828-37.
7. Moran A, Zhao D, Gu D, et al. The future impact of population growth and aging on coronary heart disease in China: projections from the Coronary Heart Disease Policy Model-China. *BMC public health* 2008;8(1):394.
8. Beijing Municipal Bureau of Statistics. Permanent population (1978-2014) 2014 [Available from: [http://www.bjstats.gov.cn/English/MR/Population/201603/t20160303\\_337912.html](http://www.bjstats.gov.cn/English/MR/Population/201603/t20160303_337912.html) accessed October 20 2015.
9. Beijing Municipal Bureau of Statistics. Permanent residents age-sex pyramid 2010 [Available from: <http://www.bjstats.gov.cn/rkjd/> accessed October 20 2015.
